# Supplementary material for: Efficient and ultraviolet durable planar perovskite solar cells via a ferrocenecarboxylic acid modified nickel oxide hole transport layer
Source: Royal Society of Chemistry journal article supplement (doi:10.1039/c7nr08750k), 2018-01-01
Supplement: c7nr08750k1.pdf [file c7nr08750k1.pdf]

## Supporting Information

### Efficient and Ultraviolet Durable Planar Perovskite Solar Cells via Ferrocenedicarboxylic Acid Modified Nickel Oxide Hole Transport Layer

Jiankai Zhang,<sup>a§</sup> Hui Luo,<sup>a§</sup> Weijia Xie,<sup>a§</sup> Xuanhuai Lin,<sup>a</sup> Xian Hou,<sup>a</sup> Jianping Zhou,<sup>b\*</sup> Sumei Huang,<sup>a</sup> Wei Ou-Yang,<sup>a</sup> Zhuo Sun<sup>a</sup> and Xiaohong Chen<sup>a,\*</sup>

a. Engineering Research Center for Nanophotonics and Advanced Instrument, Ministry of Education, and School of Physics and Materials Science, East China Normal University, Shanghai 200062, China. E-mail: [xhchen@phy.ecnu.edu.cn](mailto:xhchen@phy.ecnu.edu.cn)

b. School of Automation Engineering, Shanghai University of Electric Power, Shanghai 200090, China. E-mail: [zhoujianping@shiep.edu.cn](mailto:zhoujianping@shiep.edu.cn)

§ First co-authors, \*Corresponding authors.

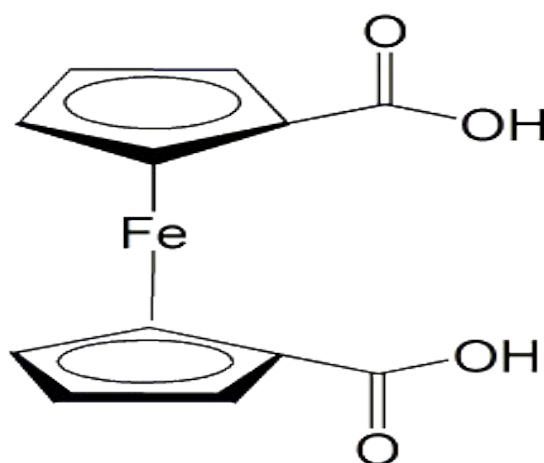

Figure S1 Chemical structure of ferrocenedicarboxylic acid (FDA).

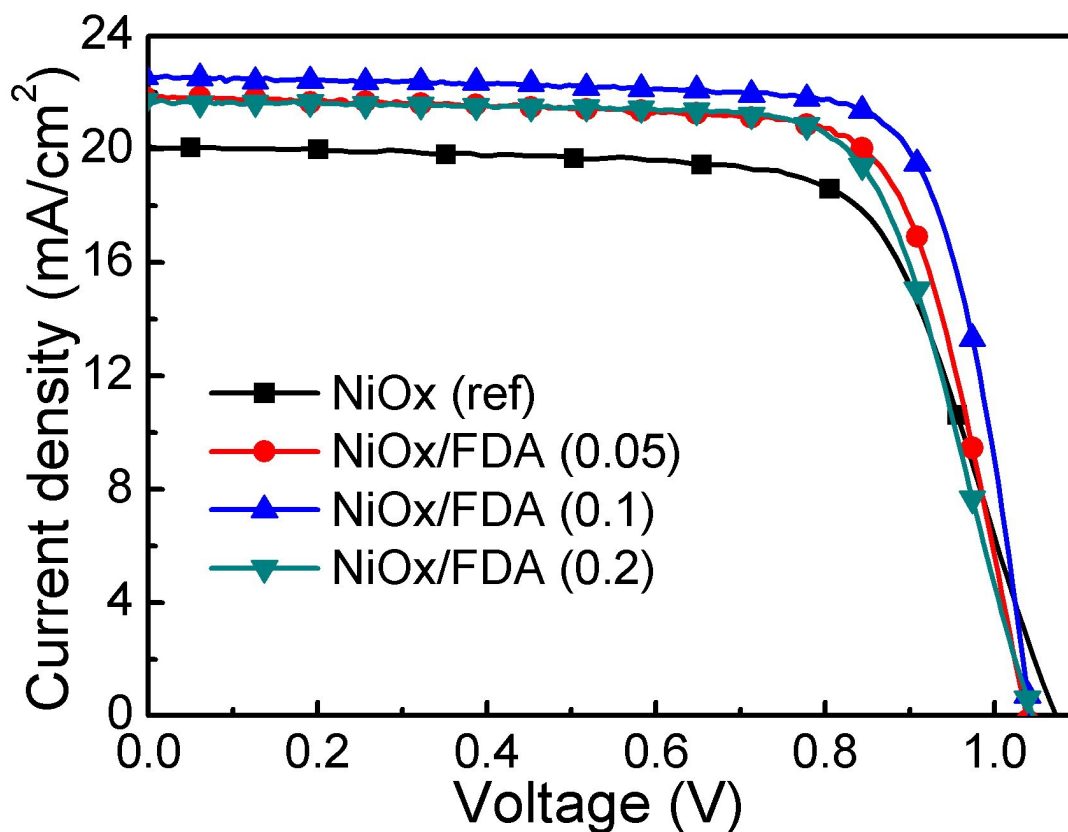

Figure S2 J–V curves of PSCs based on NiO<sub>x</sub> modified with different FDA concentration. FDA concentration spin-coated onto NiO<sub>x</sub> surface are 0, 0.05, 0.1 and 0.2 mg/ml, respectively.

Table S1 Photovoltaic parameters of NiO<sub>x</sub> based PSCs with different modified concentration of FDA.

| NiO <sub>x</sub> /FDA<br>(mg/ml) | Voc (V) | Jsc<br>(mA/cm <sup>2</sup> ) | FF (%) | PCE (%)<br>) | R <sub>S</sub> (Ω·cm <sup>2</sup> )<br>) | R <sub>SH</sub> (Ω·cm <sup>2</sup> ) |
|----------------------------------|---------|------------------------------|--------|--------------|------------------------------------------|--------------------------------------|
| NiO <sub>x</sub> (ref.)          | 1.08    | 20.19                        | 69.4   | 15.13        | 12.1                                     | 1522                                 |
| 0.05                             | 1.04    | 21.84                        | 74.5   | 16.90        | 7.0                                      | 1477                                 |
| 0.1                              | 1.04    | 22.56                        | 77.43  | 18.20        | 3.7                                      | 1379                                 |
| 0.2                              | 1.05    | 21.67                        | 72.7   | 16.53        | 10.8                                     | 3011                                 |

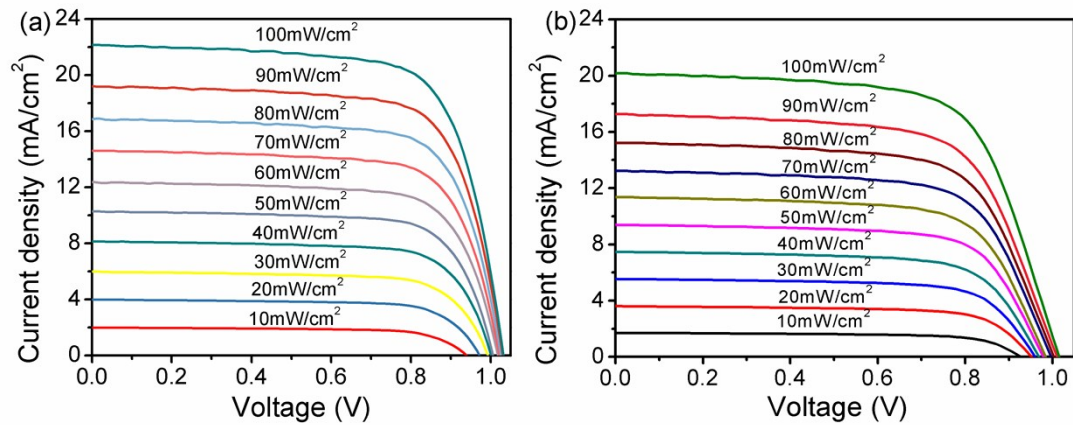

Figure S3 J-V curves of PSCs based  $\text{NiO}_x$  with (a) and without (b) FDA modification as a function of light intensity. FDA modified concentration spin-coated onto  $\text{NiO}_x$  surface is 0.1 mg/ml.

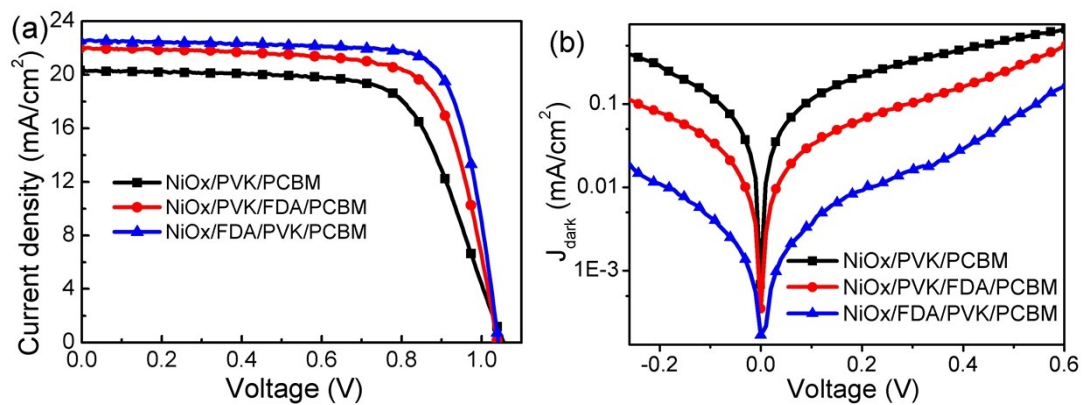

Figure S4 (a) J-V and (b) dark J-V curves of three types of PSCs.  $\text{NiO}_x/\text{FDA}$  presents that perovskite layer was spin-coated onto the surface of  $\text{NiO}_x$  modified with FDA. FDA/PCBM presents that FDA solution was firstly spin-coated onto perovskite layer before further spin-coating PCBM layer. The FDA modified concentration is 0.1 mg/ml.

Table S2 Photovoltaic parameters of corresponding PSCs with and without FDA modification.

| Cells Structure                                  | $V_{oc}$ (V) | $J_{sc}$ ( $\text{mA}/\text{cm}^2$ ) | FF (%) | PCE (%) | $R_s$ ( $\Omega \cdot \text{cm}^2$ ) | $R_{sh}$ ( $\Omega \cdot \text{cm}^2$ ) |
|--------------------------------------------------|--------------|--------------------------------------|--------|---------|--------------------------------------|-----------------------------------------|
| $\text{NiO}_x/\text{PVK}/\text{PCBM}$            | 1.08         | 20.19                                | 69.4   | 15.13   | 12.1                                 | 1522                                    |
| $\text{NiO}_x/\text{PVK}/\text{FDA}/\text{PCBM}$ | 1.04         | 21.99                                | 72.6   | 16.62   | 6.0                                  | 1665                                    |
| $\text{NiO}_x/\text{FDA}/\text{PVK}/\text{PCBM}$ | 1.04         | 22.56                                | 77.4   | 18.20   | 3.7                                  | 1379                                    |

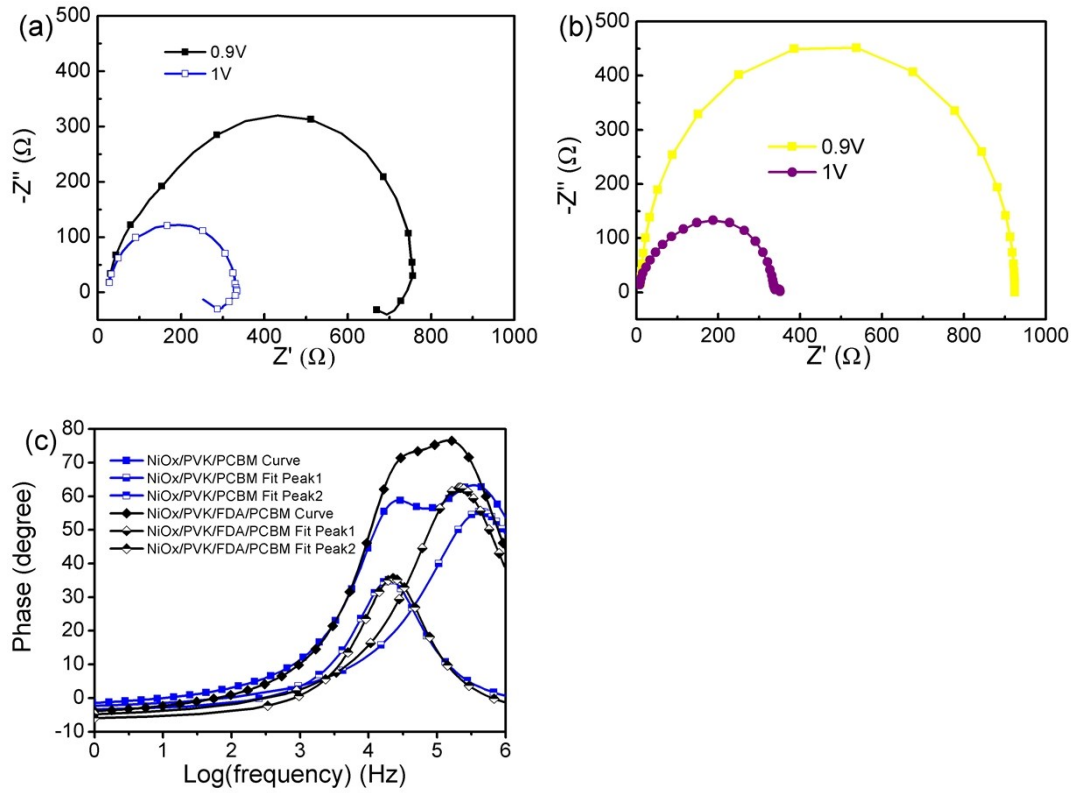

Figure S5 Nyquist plots of PSCs with (a) NiO<sub>x</sub>/PVK/PCBM and (b) NiO<sub>x</sub>/PVK/FDA/PCBM at the forward bias voltage of 0.9 V and 1.0 V in the dark condition. (c) Bode-phase plots of PSCs with NiO<sub>x</sub>/PVK/PCBM and NiO<sub>x</sub>/PVK/FDA/PCBM at the bias voltage of 0.9 V. FDA concentration spin-coated onto perovskite (PVK) layer is 0.1mg/ml.

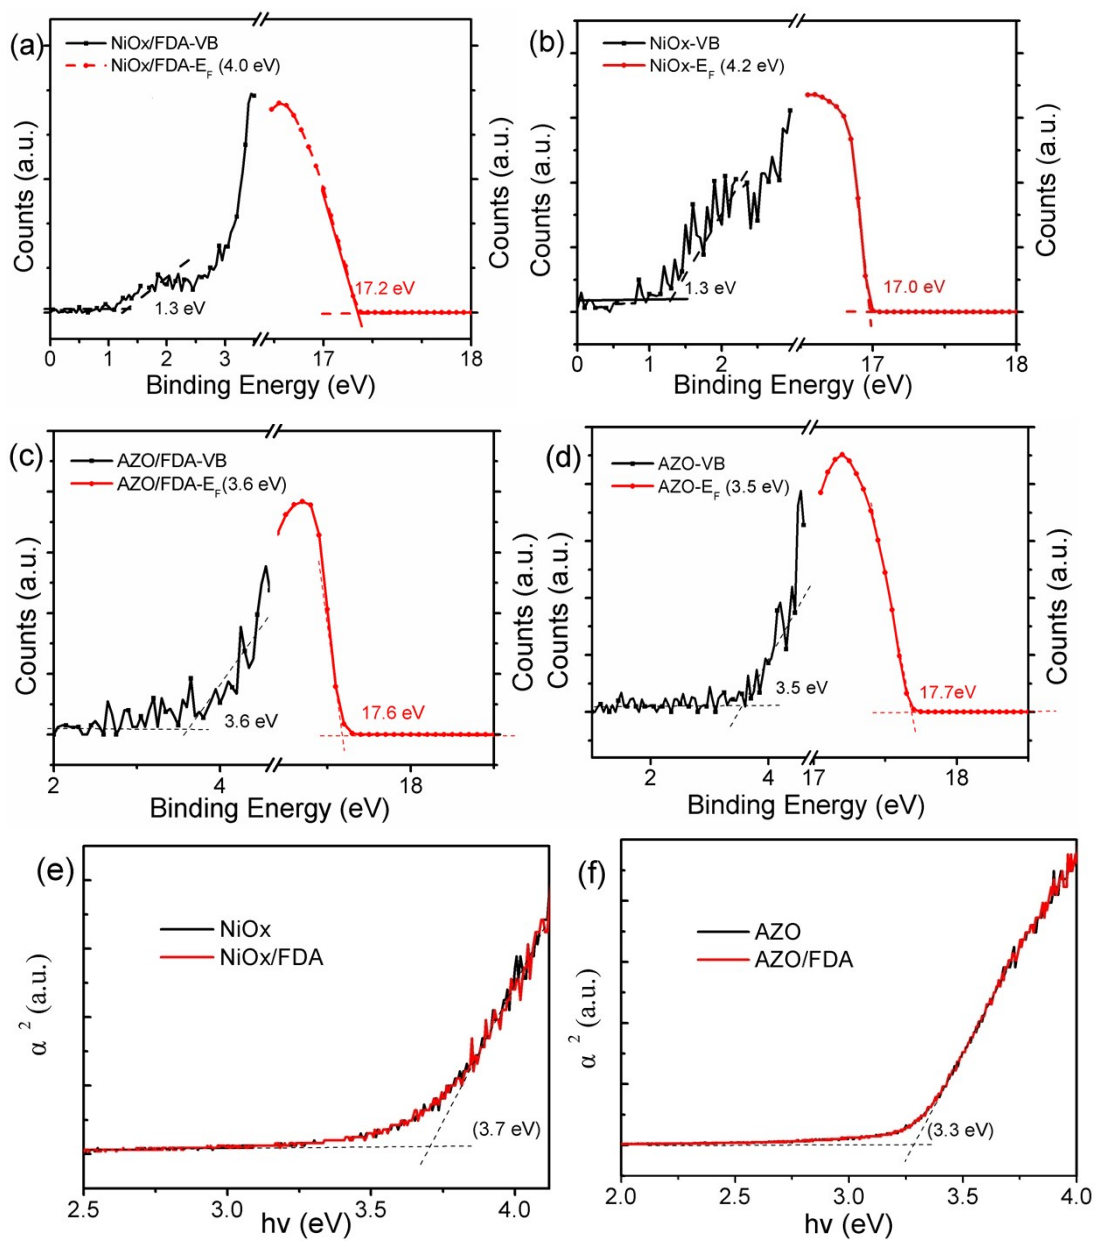

Figure S6 UPS secondary electron emission cut off and valence band edge measured for NiO<sub>x</sub> modified with (a) and without (b) FDA layer, for AZO modified with (c) and without (d) FDA layer. Optical band gap of (e) NiO<sub>x</sub> and (f) AZO films modified with and without FDA.
